# Supplementary material
Source: PubMed Central journal article supplement (PMC7062018)
Supplement: rspb20192527supp2.pdf [file rspb20192527supp2.pdf]

Supplementary material:

Table S1. Table presenting physical and chemical characteristics of the soils and the crops grown in the fields in 3 seasons before the collection

| soil | pH   | SD   | OM    | SD   | Fe   | SD   | K      | SD    | Mg     | SD    | P     | SD   | S     | SD   | C    | SD   | N    | SD   | C:N   | soil type  | 2016          | 2015            | 2014              |
|------|------|------|-------|------|------|------|--------|-------|--------|-------|-------|------|-------|------|------|------|------|------|-------|------------|---------------|-----------------|-------------------|
| BS   | 7.53 | 0.05 | 0.24  | 0.04 | 0.19 | 0.01 | 2.02   | 0.32  | 0.00   | 0.00  | 0.11  | 0.03 | 0.00  | 0.00 | 0.05 | 0.01 | 0.00 | 0.00 | NA    | Sand       | -             | -               | -                 |
| S01  | 6.22 | 0.17 | 3.46  | 0.35 | 0.09 | 0.00 | 34.00  | 0.92  | 163.19 | 1.75  | 1.40  | 0.01 | 1.29  | 0.08 | 2.31 | 0.18 | 0.14 | 0.01 | 16.50 | Sand       | -             | -               | -                 |
| S02  | 6.75 | 0.04 | 3.81  | 0.08 | 0.03 | 0.00 | 86.66  | 2.38  | 36.86  | 0.79  | 0.89  | 0.02 | 2.50  | 0.15 | 1.60 | 0.08 | 0.11 | 0.01 | 14.55 | Clay       | Wheat         | Potatoes        | Wheat             |
| S03  | 5.28 | 0.27 | 5.49  | 0.68 | 0.45 | 0.06 | 59.95  | 2.29  | 56.74  | 2.11  | 2.69  | 0.08 | 2.60  | 0.16 | 3.77 | 1.13 | 0.26 | 0.10 | 14.50 | Sand       | Winter wheat  | Winter wheat    | Winter wheat      |
| S04  | 7.30 | 0.30 | 3.10  | 0.29 | 0.02 | 0.00 | 117.12 | 1.20  | 56.49  | 0.25  | 1.53  | 0.05 | 7.21  | 0.99 | 2.11 | 0.02 | 0.13 | 0.00 | 16.23 | Clay       | Wheat         | Onions          | Lucerne           |
| S05  | 6.47 | 0.10 | 3.56  | 0.37 | 0.16 | 0.00 | 109.72 | 2.16  | 74.87  | 1.58  | 7.76  | 0.32 | 1.29  | 0.18 | 1.99 | 0.53 | 0.16 | 0.04 | 12.44 | Clay       | Winter wheat  | Potatoes        | Winter wheat      |
| S06  | 7.58 | 0.02 | 3.51  | 0.40 | 0.05 | 0.00 | 223.26 | 1.92  | 84.60  | 0.92  | 2.62  | 0.08 | 12.23 | 0.85 | 2.72 | 1.11 | 0.19 | 0.10 | 14.32 | Sandy loam | Rye           | Leaf vegetables | Winter wheat      |
| S07  | 7.58 | 0.06 | 4.32  | 0.36 | 0.03 | 0.00 | 82.92  | 1.74  | 61.11  | 0.43  | 1.66  | 0.05 | 5.57  | 0.07 | 2.92 | 0.11 | 0.18 | 0.01 | 16.22 | Sand       | Winter wheat  | Potatoes        | Winter wheat      |
| S08  | 6.87 | 0.06 | 2.81  | 0.51 | 0.08 | 0.00 | 181.54 | 3.76  | 109.68 | 1.70  | 16.23 | 0.05 | 1.14  | 0.05 | 1.94 | 0.24 | 0.16 | 0.01 | 12.13 | Sand       | Spring wheat  | Pattison/ yakon | Pattison/ yakon   |
| S09  | 6.87 | 0.18 | 3.26  | 0.32 | 0.06 | 0.01 | 174.31 | 1.13  | 113.01 | 0.78  | 3.06  | 0.07 | 1.26  | 0.22 | 1.35 | 0.14 | 0.12 | 0.01 | 11.25 | Sand       | Spring wheat  | Onions          | Sweet corn        |
| S10  | 7.49 | 0.04 | 2.92  | 0.44 | 0.02 | 0.00 | 97.07  | 2.67  | 70.88  | 0.54  | 1.12  | 0.07 | 2.96  | 0.05 | 2.62 | 0.13 | 0.16 | 0.01 | 16.38 | Clay       | Spelt         | Peas            | Beetroot/pumpkins |
| S11  | 7.28 | 0.19 | 3.48  | 0.47 | 0.11 | 0.00 | 68.77  | 1.10  | 56.43  | 0.58  | 5.43  | 0.04 | 1.17  | 0.15 | 1.99 | 0.88 | 0.16 | 0.07 | 12.44 | Sand       | Luzerne/grass | Luzerne/grass   | Barley            |
| S12  | 7.75 | 0.01 | 3.81  | 0.32 | 0.02 | 0.00 | 233.38 | 0.68  | 83.72  | 0.95  | 1.06  | 0.01 | 9.00  | 0.29 | 2.03 | 0.35 | 0.14 | 0.04 | 14.50 | Clay       | Celery        | Cabbage         | Grass clover      |
| S13  | 7.55 | 0.14 | 7.03  | 0.25 | 0.04 | 0.00 | 207.13 | 4.04  | 122.52 | 1.44  | 3.40  | 0.12 | 7.57  | 0.06 | 3.82 | 0.01 | 0.34 | 0.00 | 11.24 | Clay       | Grass clover  | Grass clover    | Red cabbage       |
| S14  | 7.61 | 0.05 | 5.04  | 0.35 | 0.04 | 0.00 | 82.49  | 4.08  | 98.91  | 4.04  | 0.70  | 0.06 | 8.61  | 0.08 | 2.35 | 0.14 | 0.15 | 0.01 | 15.67 | Sandy clay | Winter wheat  | Beetroot        | Potatoes          |
| S15  | 7.82 | 0.05 | 3.77  | 0.63 | 0.02 | 0.00 | 45.83  | 0.53  | 60.60  | 0.52  | 0.90  | 0.05 | 5.95  | 0.06 | 1.91 | 0.08 | 0.11 | 0.01 | 17.36 | Clay       | Potatoes      | Grass clover    | Onions            |
| S16  | 7.63 | 0.12 | 2.91  | 0.57 | 0.03 | 0.00 | 53.60  | 0.85  | 78.47  | 0.42  | 5.61  | 0.17 | 2.79  | 0.21 | 2.33 | 1.44 | 0.18 | 0.13 | 12.94 | Clay       | Luzerne       | Potatoes        | Carrots           |
| S17  | 7.75 | 0.06 | 4.23  | 0.79 | 0.01 | 0.00 | 87.17  | 2.45  | 74.54  | 0.80  | 1.03  | 0.04 | 2.27  | 0.06 | 2.63 | 0.05 | 0.15 | 0.00 | 17.53 | Clay       | Potatoes      | Spelt           | Pumpkins          |
| S18  | 7.69 | 0.06 | 7.53  | 0.94 | 0.02 | 0.00 | 53.59  | 0.56  | 113.54 | 0.51  | 1.49  | 0.06 | 5.80  | 0.37 | 2.30 | 0.02 | 0.24 | 0.00 | 9.58  | Clay       | Winter wheat  | Winter wheat    | Winter wheat      |
| S19  | 7.73 | 0.02 | 5.38  | 0.50 | 0.02 | 0.01 | 63.09  | 0.68  | 104.28 | 2.48  | 1.50  | 0.01 | 5.00  | 0.28 | 2.35 | 0.02 | 0.24 | 0.00 | 9.79  | Clay       | Winter wheat  | Winter wheat    | Sugar beet        |
| S20  | 7.30 | 0.16 | 8.00  | 0.21 | 0.10 | 0.00 | 234.45 | 3.76  | 299.63 | 6.42  | 2.69  | 0.02 | 6.98  | 0.41 | 3.25 | 0.65 | 0.36 | 0.10 | 9.03  | Sand       | Maize         | Maize           | Winter wheat      |
| S21  | 5.56 | 0.12 | 20.59 | 1.00 | 0.82 | 0.07 | 58.82  | 4.26  | 484.44 | 14.16 | 4.86  | 0.10 | 24.70 | 0.13 | 9.30 | 0.39 | 1.04 | 0.03 | 8.94  | Sand       | Pasture       | Pasture         | Pasture           |
| S22  | 6.50 | 0.10 | 3.02  | 0.48 | 0.03 | 0.01 | 74.84  | 1.84  | 237.38 | 3.52  | 0.87  | 0.09 | 3.67  | 0.15 | 2.65 | 0.10 | 0.30 | 0.01 | 8.83  | Clay       | Maize         | Winter wheat    | Sugar beet        |
| S23  | 5.92 | 0.39 | 4.50  | 0.50 | 0.47 | 0.04 | 51.98  | 1.52  | 122.23 | 3.32  | 11.88 | 0.27 | 4.03  | 0.29 | 1.92 | 0.60 | 0.17 | 0.05 | 11.29 | Sand       | Grass clover  | Maize           | Maize             |
| S24  | 7.27 | 0.06 | 6.15  | 0.38 | 0.02 | 0.00 | 76.47  | 1.19  | 66.70  | 0.61  | 2.58  | 0.12 | 5.24  | 0.45 | 0.98 | 0.07 | 0.11 | 0.00 | 8.91  | Clay       | Wheat         | Beetroot        | Wheat             |
| S25  | 5.35 | 0.15 | 7.34  | 0.55 | 0.24 | 0.04 | 57.68  | 12.82 | 83.30  | 3.25  | 1.26  | 0.05 | 5.61  | 1.70 | 3.17 | 0.03 | 0.26 | 0.01 | 12.19 | Clay       | Forest        | Forest          | Forest            |
| S26  | 5.76 | 0.05 | 8.54  | 1.92 | 0.12 | 0.01 | 27.52  | 2.83  | 113.43 | 0.69  | 1.41  | 0.14 | 3.50  | 0.46 | 3.13 | 0.12 | 0.32 | 0.01 | 9.78  | Clay       | Pasture       | Pasture         | Pasture           |
| S27  | 7.05 | 0.04 | 7.86  | 0.94 | 0.04 | 0.01 | 52.66  | 2.86  | 98.95  | 2.37  | 0.85  | 0.04 | 4.53  | 0.47 | 3.21 | 0.14 | 0.31 | 0.01 | 10.35 | Clay       | Winter rape   | Winter wheat    | Winter rape       |
| S28  | 7.13 | 0.07 | 3.29  | 0.12 | 0.02 | 0.00 | 71.36  | 0.44  | 160.26 | 2.70  | 0.79  | 0.02 | 1.74  | 0.24 | 1.52 | 0.01 | 0.17 | 0.00 | 8.94  | Clay       | Winter wheat  | Winter wheat    | Winter rape       |

\* to highlight the differences in the measured parameters, pH values are colored from red to blue, showing low to high values respectively.  
 Other parameters: organic matter content (OM), content of bioavailable elements (Fe, K, Mg, P, S), total carbon (C) and nitrogen (N) are colored with green bars according to their normalized values. Presented values are average of three replicates with standard deviations (SD).  
 Column "soil": soil samples in the collection S01 to S28 and BS: "Bergharen soil" used as a standard substrate in the study.

Table S2. Sequencing depths for all rhizosphere samples, the value following underscore indicates the replicate number.

| sample-id | input | filtered | denoised | merged | non-chimeric |
|-----------|-------|----------|----------|--------|--------------|
| S01_1     | 41725 | 33607    | 33607    | 17264  | 16866        |
| S01_2     | 45462 | 36178    | 36178    | 19858  | 19373        |
| S01_3     | 41822 | 33415    | 33415    | 17196  | 16778        |
| S01_4     | 49352 | 39531    | 39531    | 25025  | 23379        |
| S02_1     | 53186 | 42592    | 42592    | 23199  | 22708        |
| S02_2     | 42743 | 33988    | 33988    | 17520  | 17061        |
| S02_3     | 54037 | 42031    | 42031    | 24111  | 23450        |
| S02_4     | 43360 | 34930    | 34930    | 19538  | 19008        |
| S03_1     | 44954 | 36506    | 36506    | 20855  | 19746        |
| S03_2     | 42219 | 33757    | 33757    | 19801  | 18422        |
| S03_3     | 46183 | 36515    | 36515    | 18537  | 17677        |
| S03_4     | 46941 | 38080    | 38080    | 26964  | 21045        |
| S04_1     | 49195 | 39946    | 39946    | 22155  | 21807        |
| S04_2     | 49236 | 39690    | 39690    | 21736  | 21295        |
| S04_3     | 47442 | 38178    | 38178    | 18923  | 18293        |
| S04_4     | 49544 | 39379    | 39379    | 21418  | 21023        |
| S05_1     | 49240 | 39988    | 39988    | 22254  | 21030        |
| S05_2     | 48264 | 39067    | 39067    | 22833  | 19870        |
| S05_3     | 49934 | 39348    | 39348    | 21713  | 20461        |
| S05_4     | 39082 | 31770    | 31770    | 15274  | 14745        |
| S06_1     | 36164 | 28958    | 28958    | 14296  | 13856        |
| S06_2     | 42717 | 33193    | 33193    | 17723  | 17161        |
| S06_3     | 45214 | 36400    | 36400    | 19923  | 19316        |
| S06_4     | 48268 | 39142    | 39142    | 22538  | 21914        |
| S07_1     | 53097 | 43001    | 43001    | 24869  | 23953        |
| S07_2     | 45927 | 36549    | 36549    | 20537  | 19901        |
| S07_3     | 63205 | 50499    | 50499    | 28516  | 27743        |
| S07_4     | 33926 | 23095    | 23095    | 11884  | 11526        |
| S08_1     | 46293 | 36945    | 36945    | 19611  | 18169        |
| S08_2     | 44794 | 35469    | 35469    | 17577  | 17171        |
| S08_3     | 49441 | 39931    | 39931    | 20719  | 20031        |
| S08_4     | 37841 | 30283    | 30283    | 15807  | 15425        |
| S09_1     | 50458 | 40629    | 40629    | 20554  | 19966        |
| S09_2     | 49480 | 40250    | 40250    | 21995  | 20986        |
| S09_3     | 52163 | 41629    | 41629    | 21864  | 21281        |
| S09_4     | 42913 | 34941    | 34941    | 20271  | 19325        |
| S10_1     | 46209 | 37005    | 37005    | 19507  | 18922        |
| S10_2     | 50250 | 40050    | 40050    | 22734  | 21712        |
| S10_3     | 48066 | 38386    | 38386    | 20345  | 19824        |
| S10_4     | 49532 | 39101    | 39101    | 21937  | 21262        |
| S11_1     | 56437 | 45456    | 45456    | 23637  | 22725        |

|       |       |       |       |       |       |
|-------|-------|-------|-------|-------|-------|
| S11_2 | 39385 | 31551 | 31551 | 17438 | 16721 |
| S11_3 | 53460 | 42318 | 42318 | 25257 | 21916 |
| S11_4 | 50498 | 40678 | 40678 | 23542 | 22765 |
| S12_1 | 45994 | 36824 | 36824 | 20278 | 19617 |
| S12_2 | 51667 | 41515 | 41515 | 21963 | 21437 |
| S12_3 | 45604 | 36075 | 36075 | 18933 | 18300 |
| S12_4 | 51902 | 41044 | 41044 | 21966 | 21488 |
| S13_1 | 51177 | 36785 | 36785 | 19145 | 18648 |
| S13_2 | 41781 | 24407 | 24407 | 11186 | 10807 |
| S13_3 | 49981 | 35778 | 35778 | 18301 | 17694 |
| S13_4 | 52143 | 36067 | 36067 | 19093 | 18040 |
| S14_1 | 43642 | 34264 | 34264 | 16925 | 16489 |
| S14_2 | 48616 | 35195 | 35195 | 17718 | 17067 |
| S14_3 | 44910 | 35575 | 35575 | 19273 | 18733 |
| S14_4 | 46545 | 37762 | 37762 | 19310 | 18766 |
| S15_1 | 42858 | 34576 | 34576 | 21410 | 19796 |
| S15_2 | 44762 | 36195 | 36195 | 21763 | 20477 |
| S15_3 | 47422 | 37758 | 37758 | 22556 | 20948 |
| S15_4 | 40163 | 32478 | 32478 | 19295 | 17778 |
| S16_1 | 37249 | 29402 | 29402 | 17735 | 15462 |
| S16_2 | 42173 | 33561 | 33561 | 19422 | 17928 |
| S16_3 | 45586 | 35797 | 35797 | 19070 | 18582 |
| S16_4 | 47442 | 37272 | 37272 | 20494 | 19546 |
| S17_1 | 51215 | 40873 | 40873 | 23147 | 22687 |
| S17_2 | 36361 | 28296 | 28296 | 15250 | 14910 |
| S17_3 | 46849 | 35967 | 35967 | 21923 | 20765 |
| S17_4 | 34766 | 27361 | 27361 | 15537 | 14981 |
| S18_1 | 41336 | 32946 | 32946 | 20058 | 19553 |
| S18_2 | 40194 | 32632 | 32632 | 22587 | 20284 |
| S18_3 | 42221 | 33277 | 33277 | 20019 | 19251 |
| S18_4 | 46846 | 37084 | 37084 | 22159 | 21539 |
| S19_1 | 46160 | 37438 | 37438 | 20790 | 19621 |
| S19_2 | 50469 | 40792 | 40792 | 25392 | 24178 |
| S19_3 | 48494 | 38879 | 38879 | 22395 | 21824 |
| S19_4 | 47951 | 38527 | 38527 | 21996 | 21417 |
| S20_1 | 47183 | 38076 | 38076 | 21987 | 20928 |
| S20_2 | 42260 | 34401 | 34401 | 18843 | 17951 |
| S20_3 | 50901 | 40503 | 40503 | 24416 | 23098 |
| S20_4 | 46791 | 37990 | 37990 | 21608 | 20737 |
| S21_1 | 41015 | 33565 | 33565 | 20978 | 19475 |
| S21_2 | 42477 | 34136 | 34136 | 22696 | 20685 |
| S21_3 | 40303 | 32376 | 32376 | 20665 | 18926 |
| S21_4 | 48019 | 38702 | 38702 | 25304 | 23038 |
| S22_1 | 40909 | 32639 | 32639 | 18592 | 17702 |
| S22_2 | 41907 | 33008 | 33008 | 19844 | 19022 |

|       |       |       |       |       |       |
|-------|-------|-------|-------|-------|-------|
| S22_3 | 39314 | 30697 | 30697 | 16937 | 16152 |
| S22_4 | 38281 | 29928 | 29928 | 16296 | 15277 |
| S23_1 | 40319 | 31358 | 31358 | 18190 | 17451 |
| S23_2 | 37341 | 29756 | 29756 | 16975 | 16319 |
| S23_3 | 44530 | 34840 | 34840 | 24350 | 23209 |
| S23_4 | 32947 | 26534 | 26534 | 17998 | 15700 |
| S24_1 | 33962 | 27307 | 27307 | 18314 | 16753 |
| S24_2 | 28800 | 21596 | 21596 | 12698 | 12206 |
| S24_3 | 37292 | 29303 | 29303 | 17886 | 17219 |
| S24_4 | 34107 | 27271 | 27271 | 15776 | 15092 |
| S25_1 | 49186 | 38629 | 38629 | 23479 | 22078 |
| S25_2 | 34056 | 27924 | 27924 | 17522 | 16205 |
| S25_3 | 33382 | 26871 | 26871 | 16546 | 15777 |
| S25_4 | 46462 | 37279 | 37279 | 23340 | 22028 |
| S26_1 | 44438 | 35281 | 35281 | 24243 | 22827 |
| S26_2 | 35931 | 28941 | 28941 | 18414 | 17321 |
| S26_3 | 41725 | 33546 | 33546 | 21393 | 20124 |
| S26_4 | 38662 | 30842 | 30842 | 19765 | 18296 |
| S27_1 | 43453 | 34538 | 34538 | 18675 | 17996 |
| S27_2 | 36183 | 29045 | 29045 | 16110 | 15616 |
| S27_3 | 35734 | 29053 | 29053 | 17498 | 16072 |
| S27_4 | 45394 | 36708 | 36708 | 20020 | 19196 |
| S28_1 | 36616 | 29403 | 29403 | 17577 | 16093 |
| S28_2 | 31889 | 26103 | 26103 | 15858 | 14455 |
| S28_3 | 34760 | 27914 | 27914 | 16259 | 15566 |
| S28_4 | 45368 | 36476 | 36476 | 21778 | 20336 |

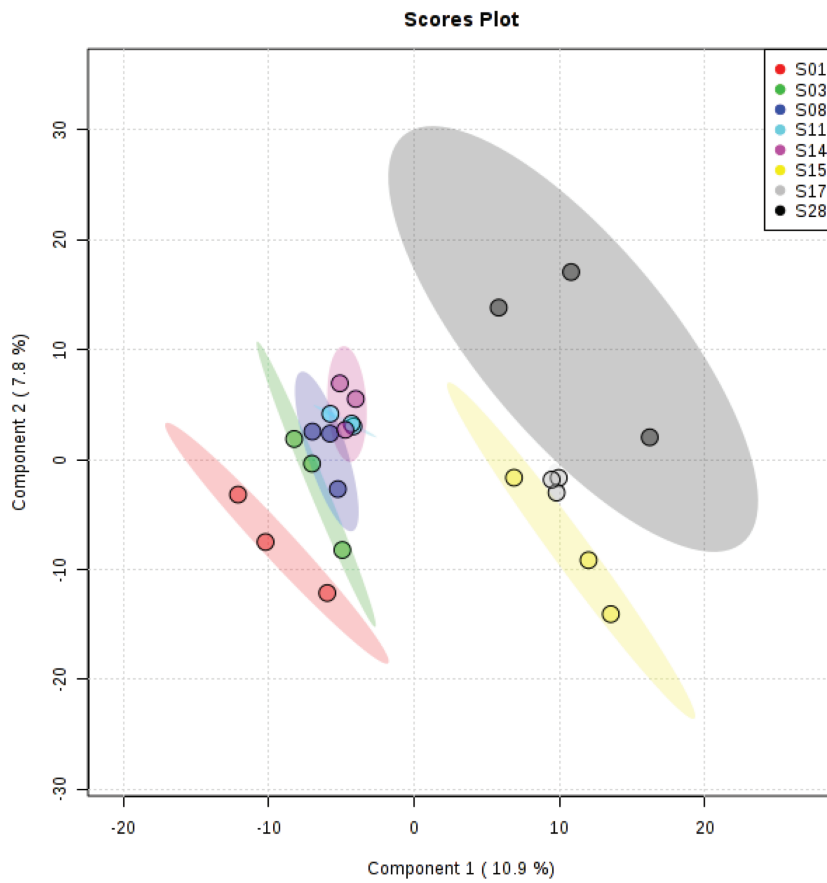

Figure S3. PCoA plot showing GC-MS profiles of volatile compounds emitted by eight soils, four suppressive (S01, S03, S11 and S28) and four conducive (S08, S14, S15 and S17) soils.

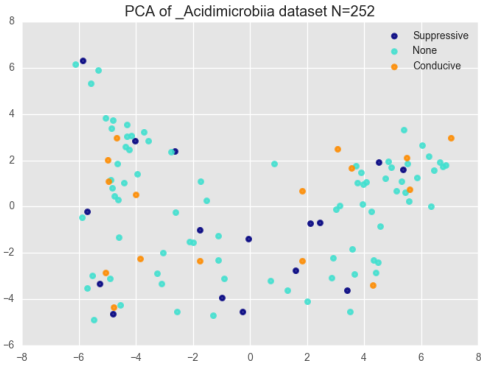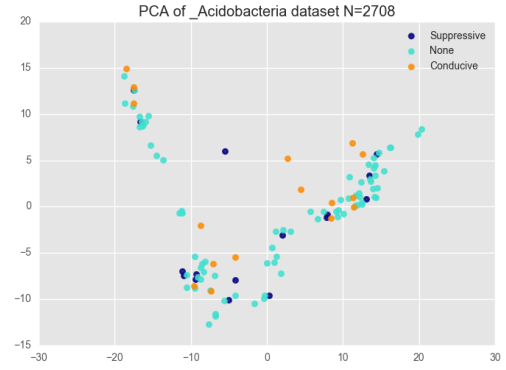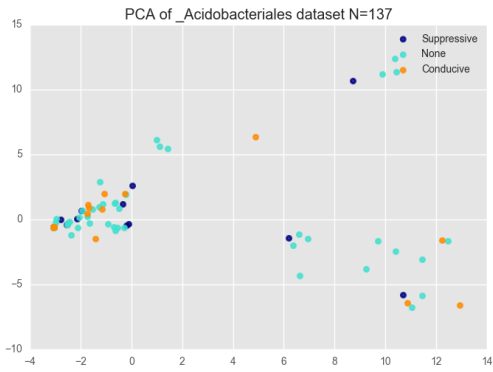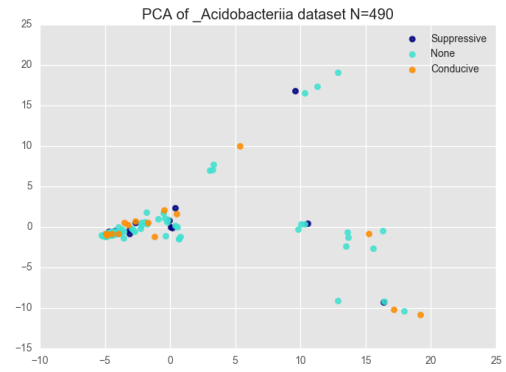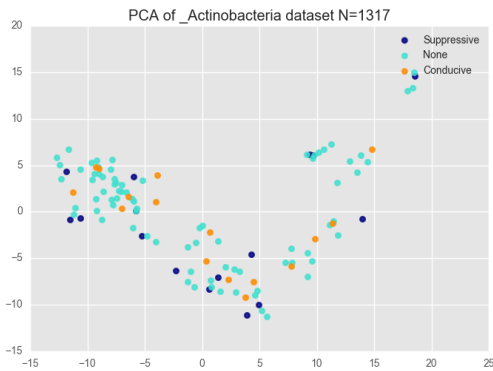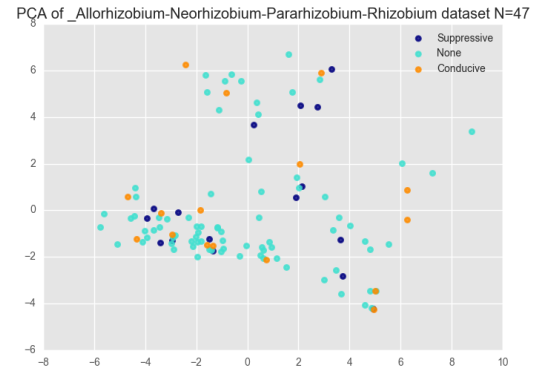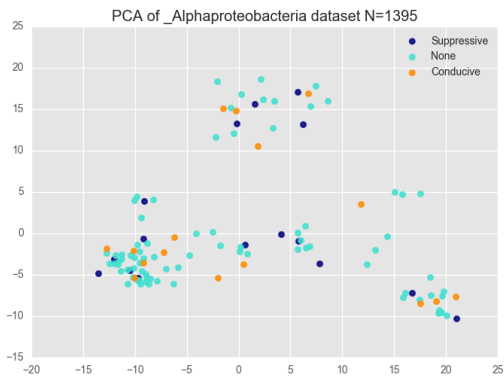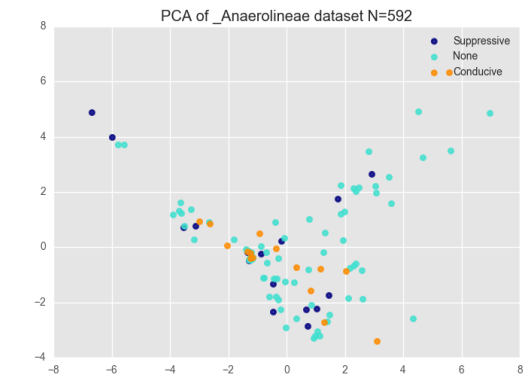

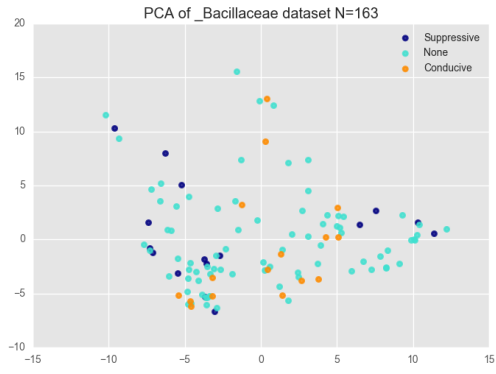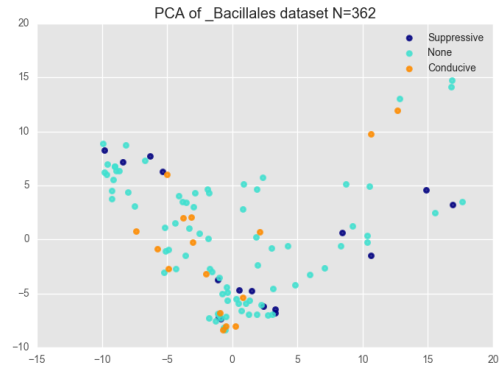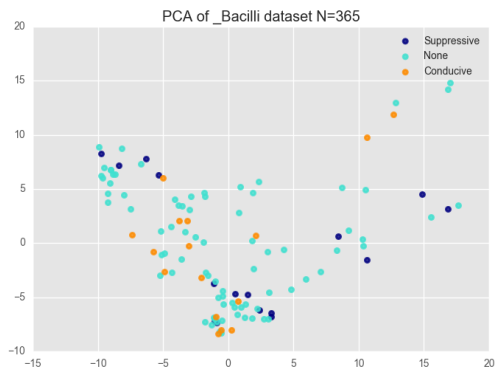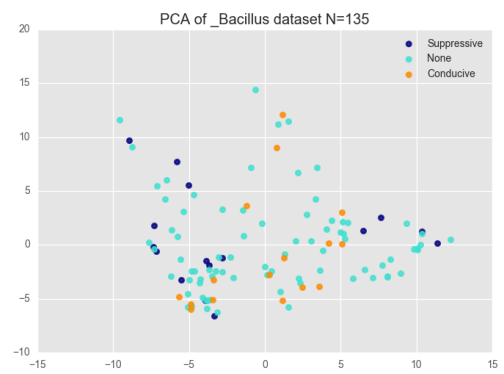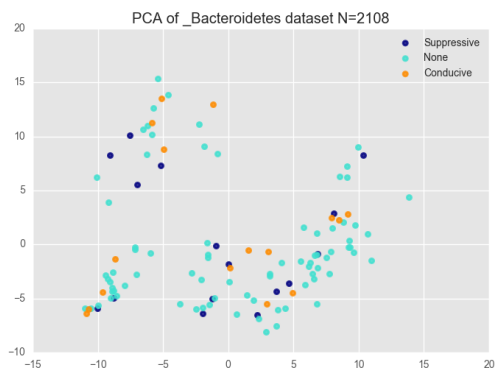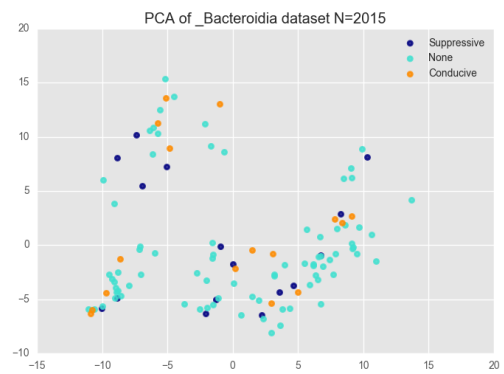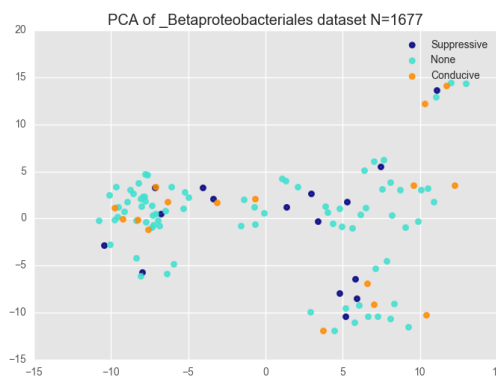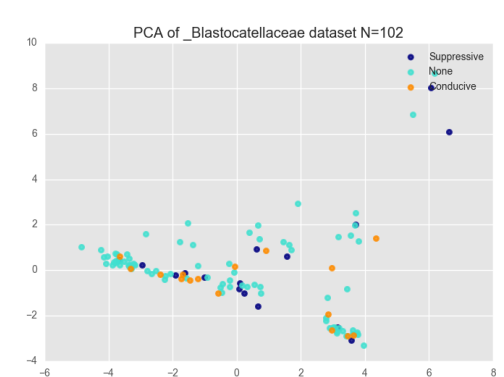

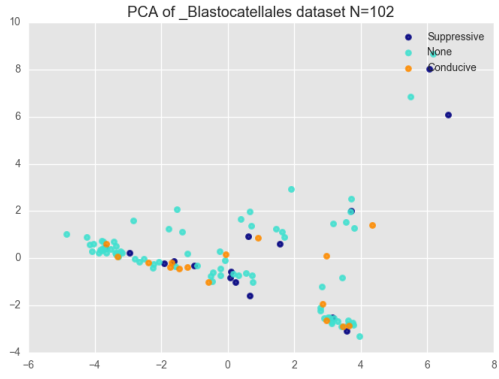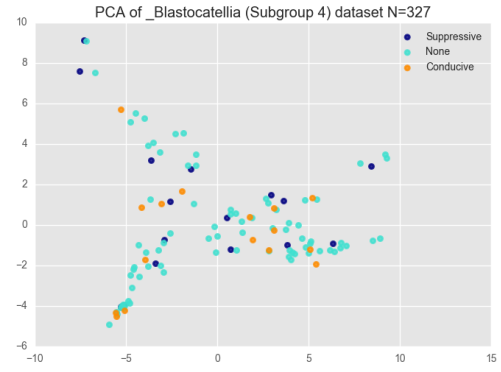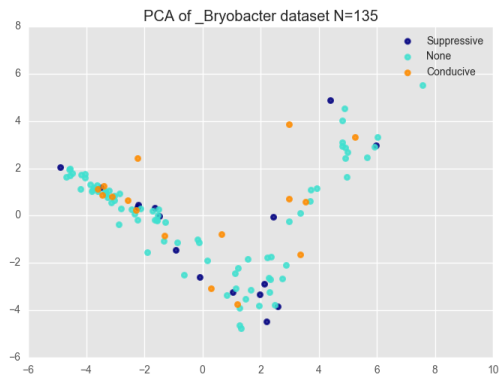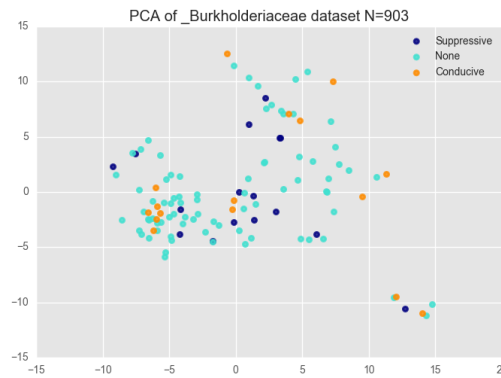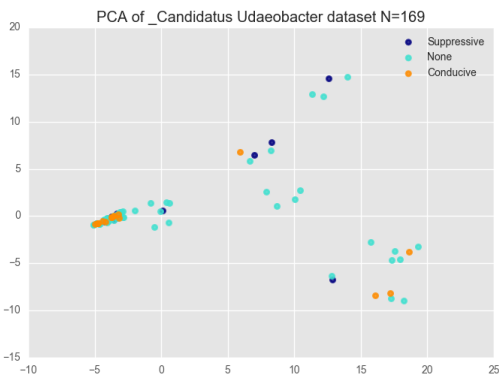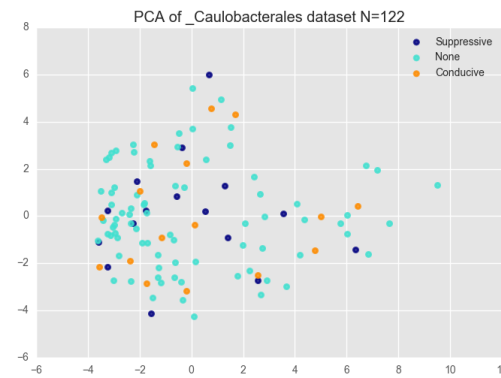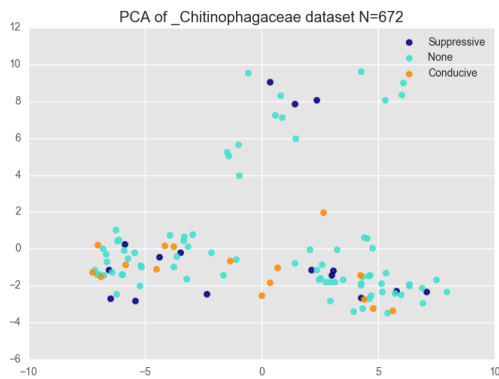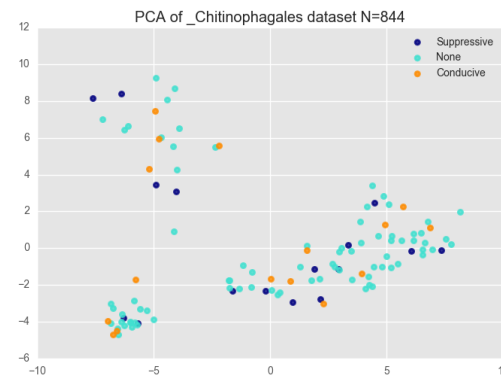



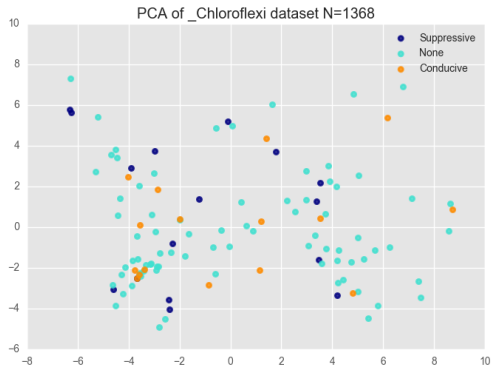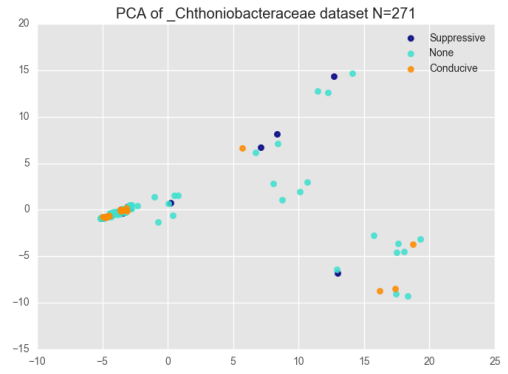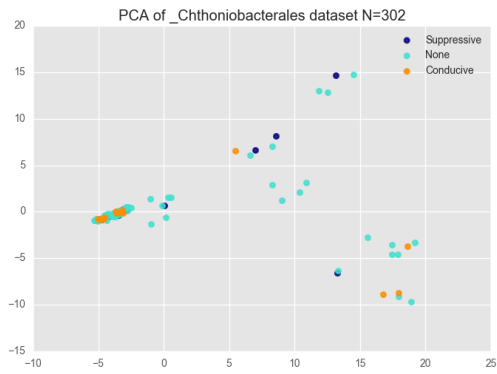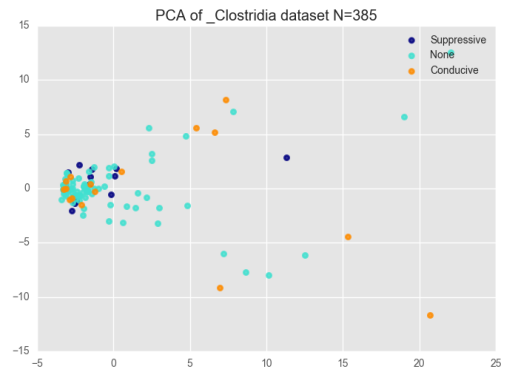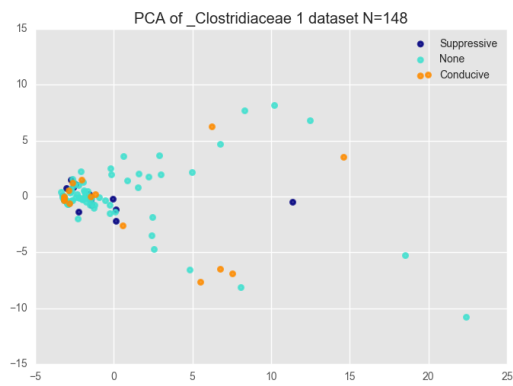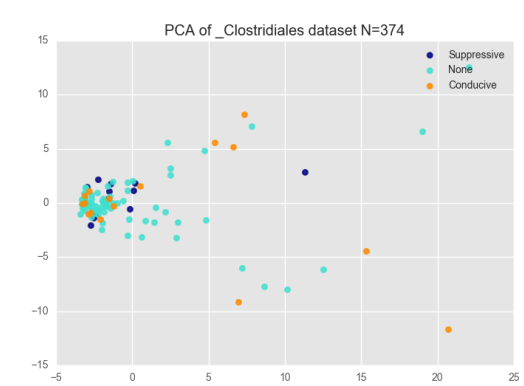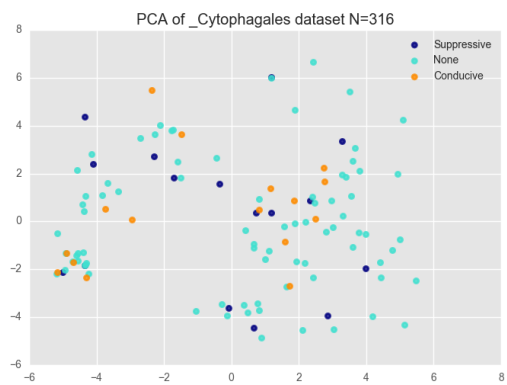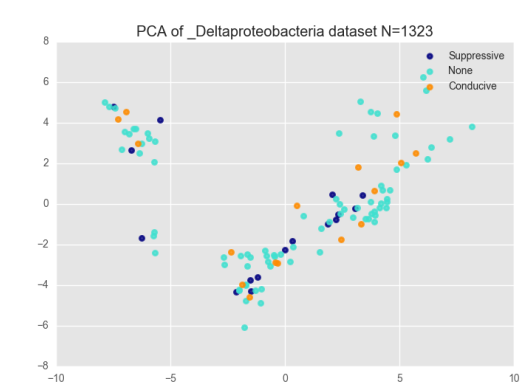

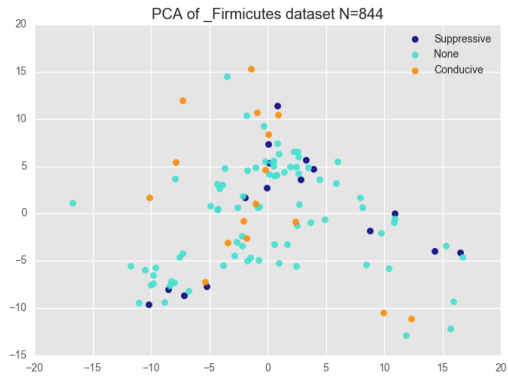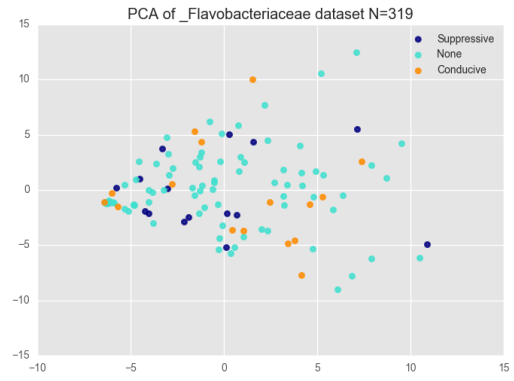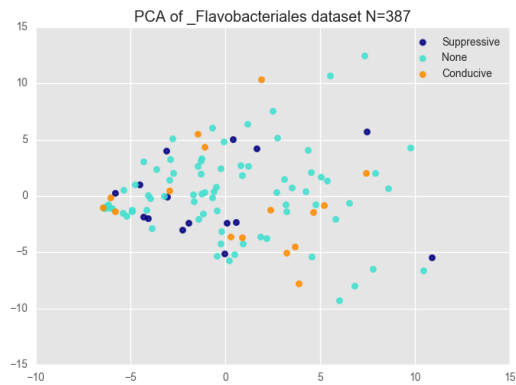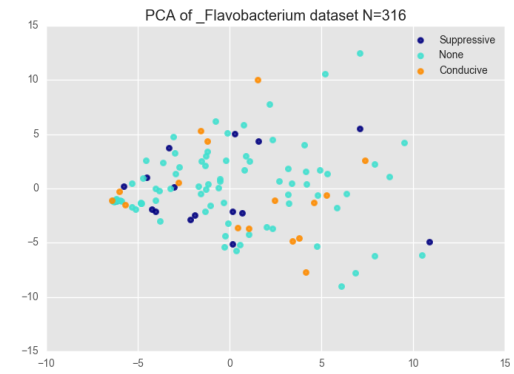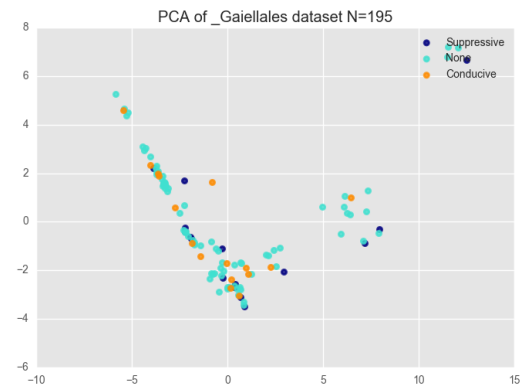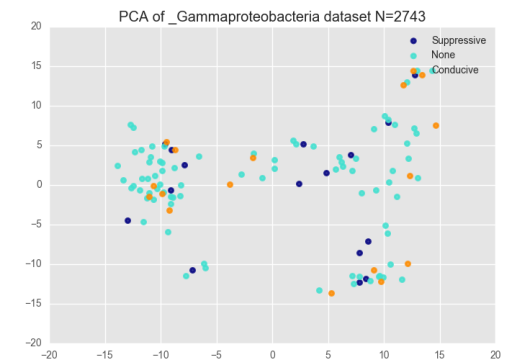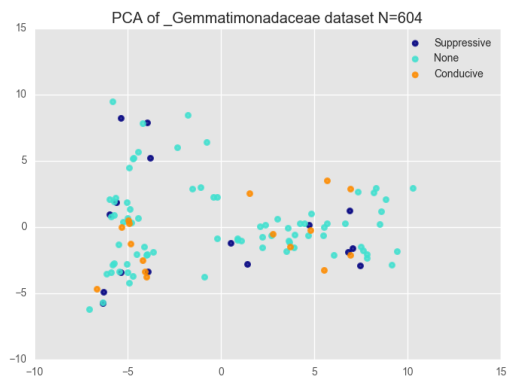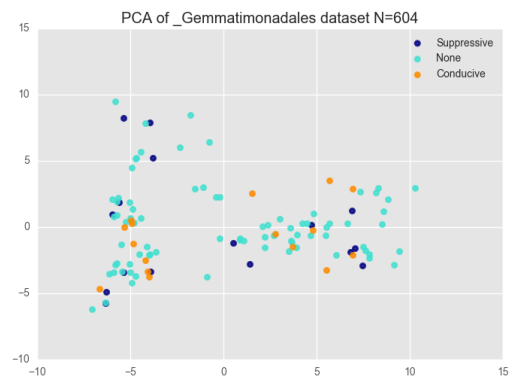

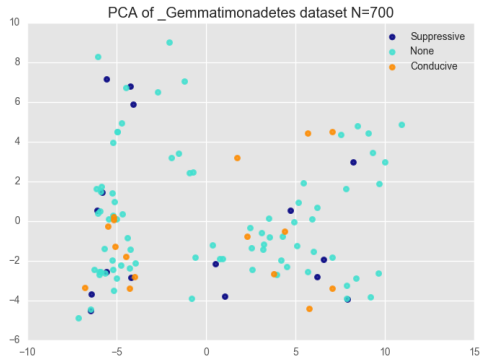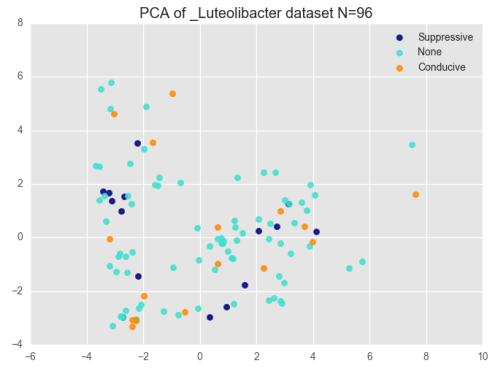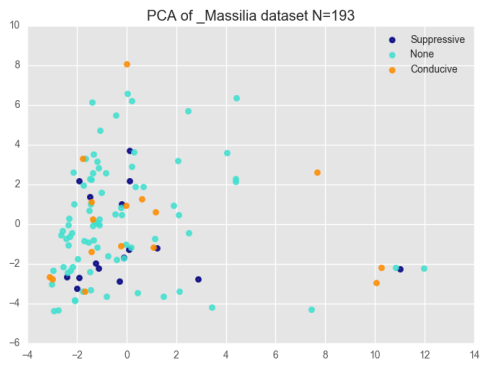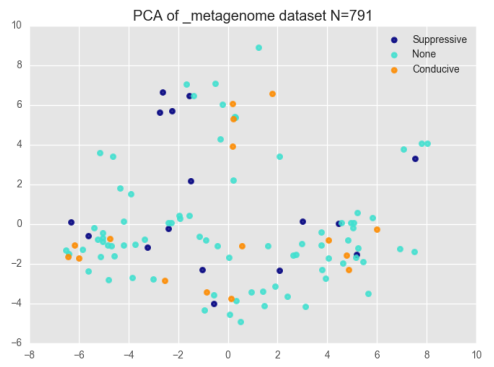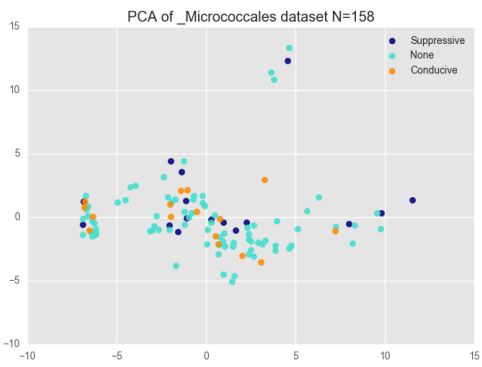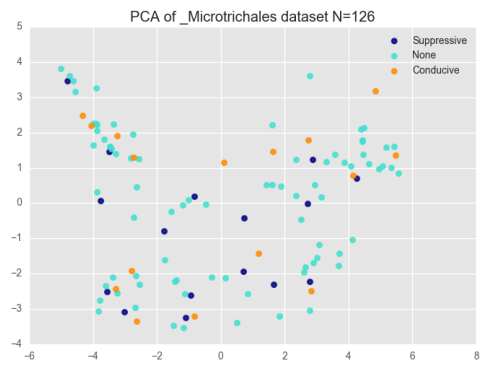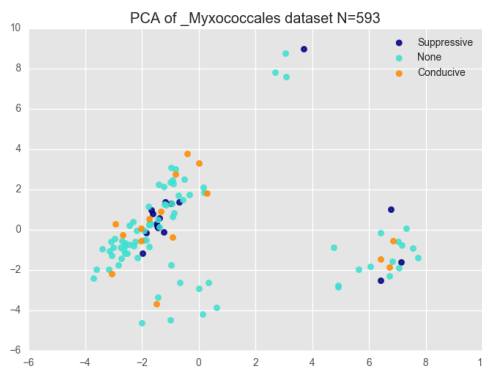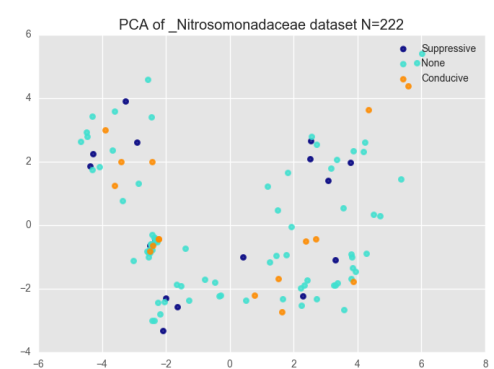

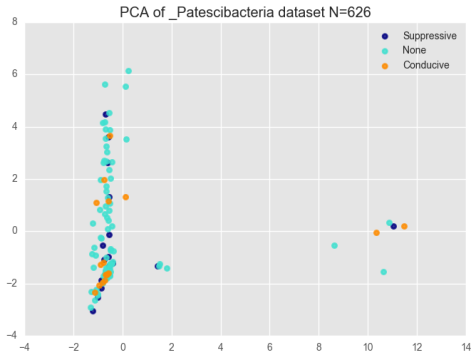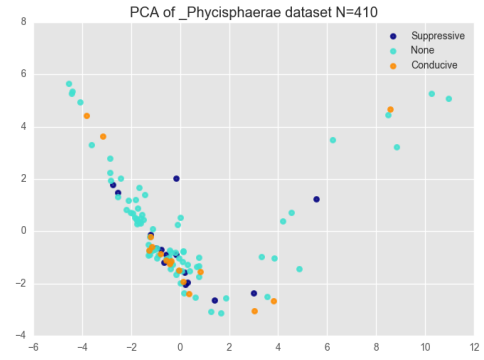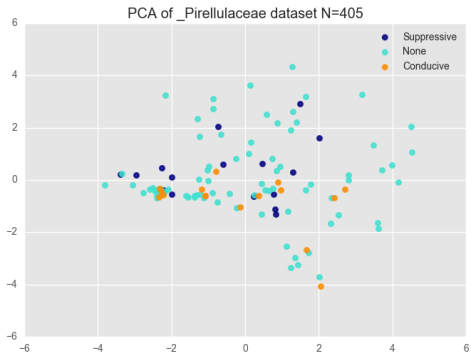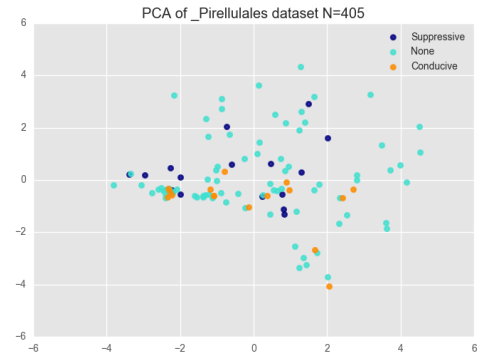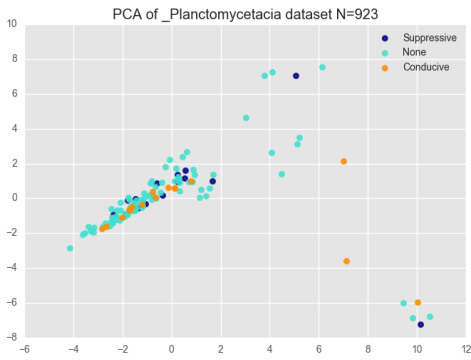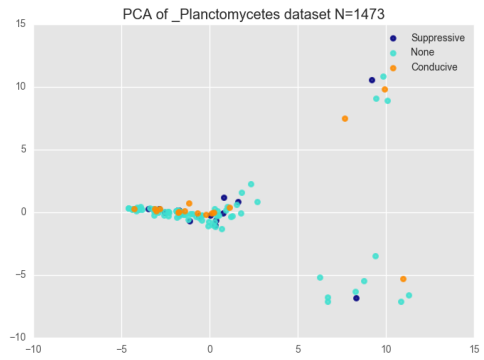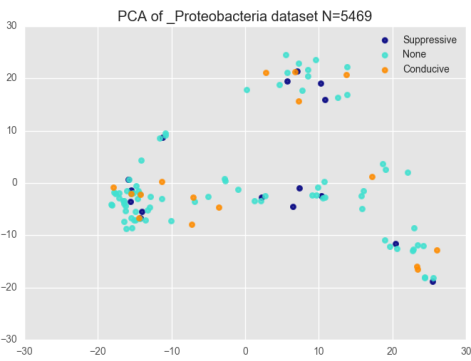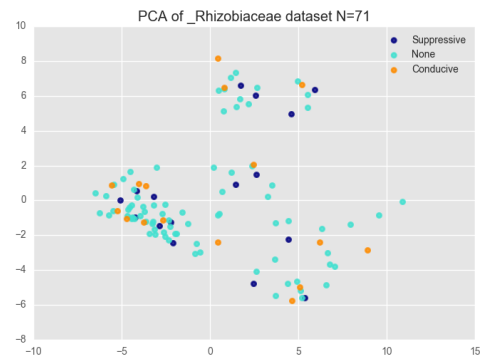

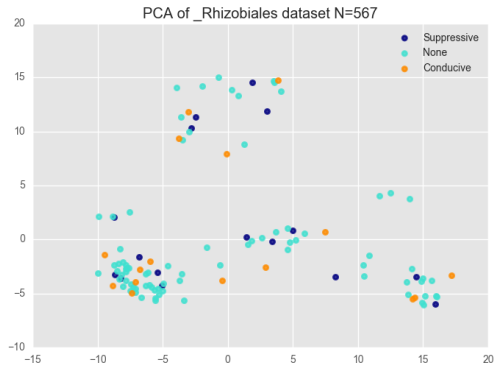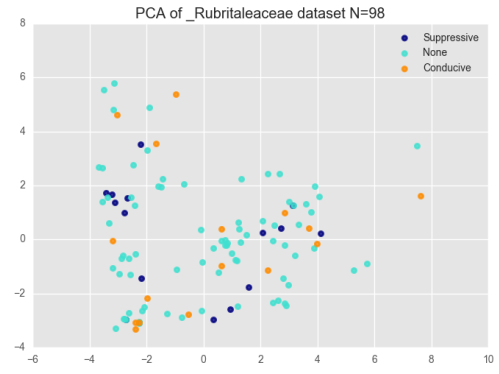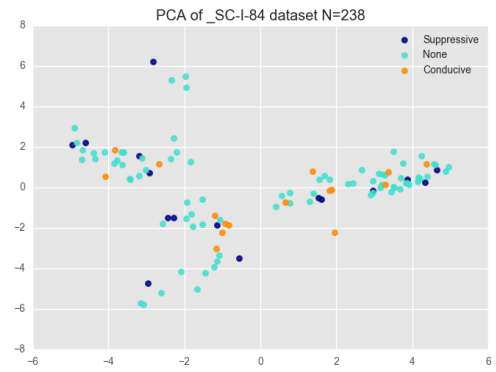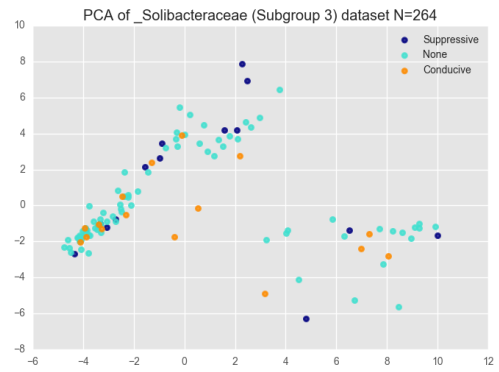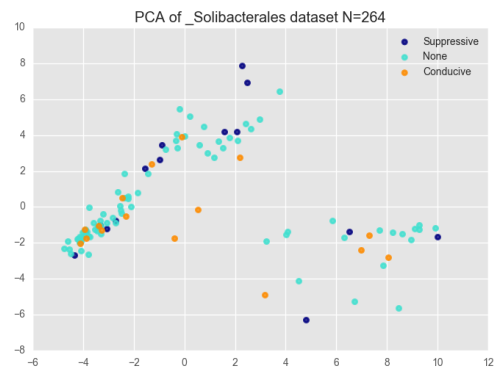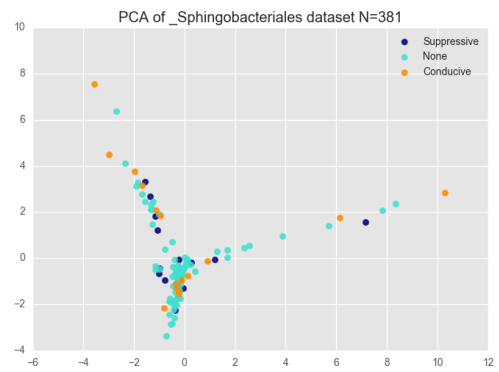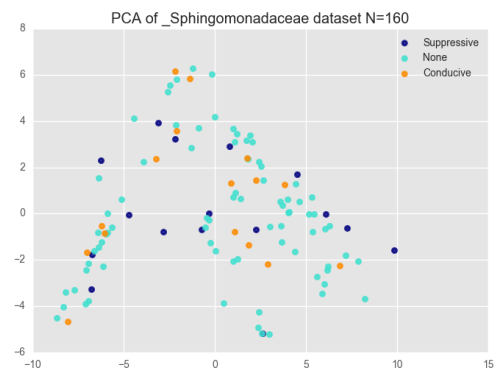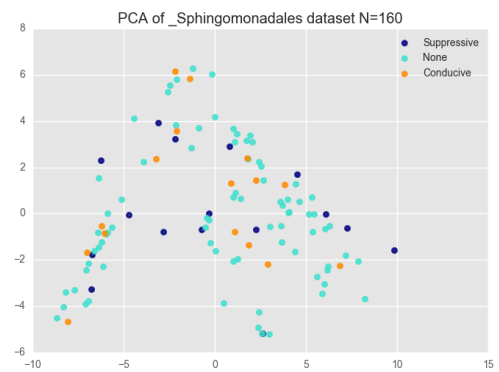

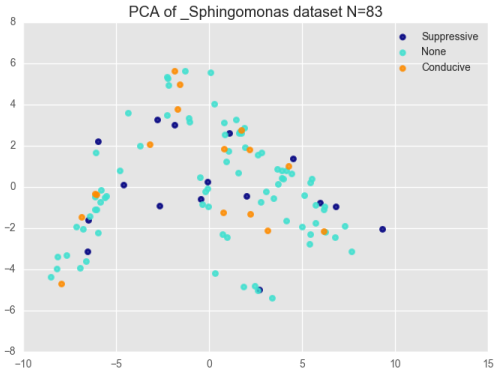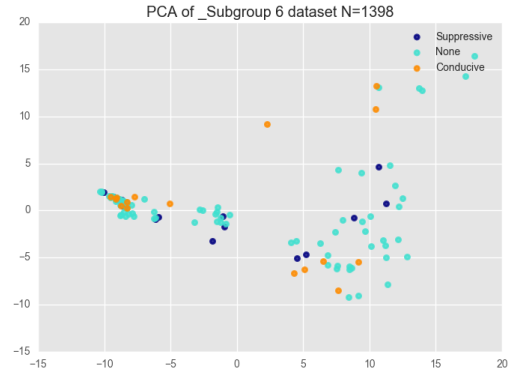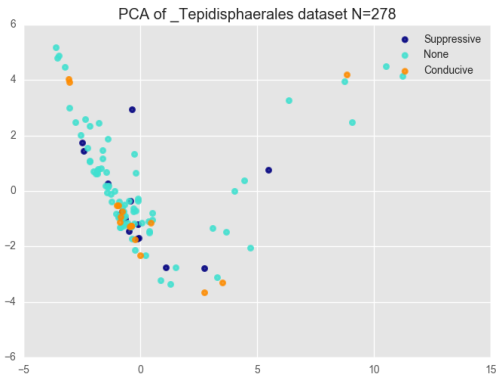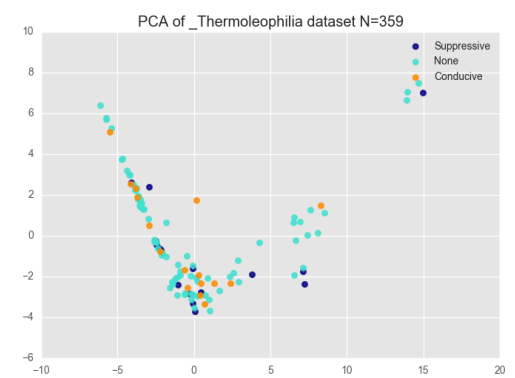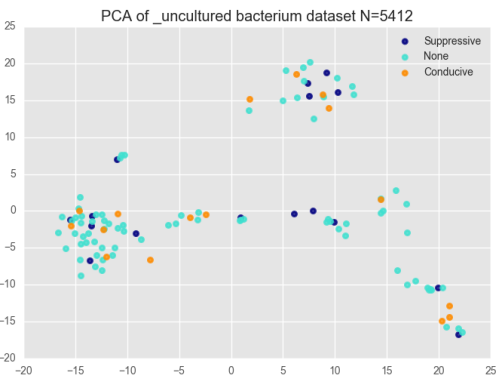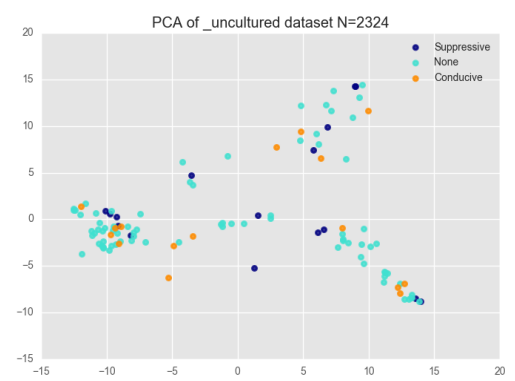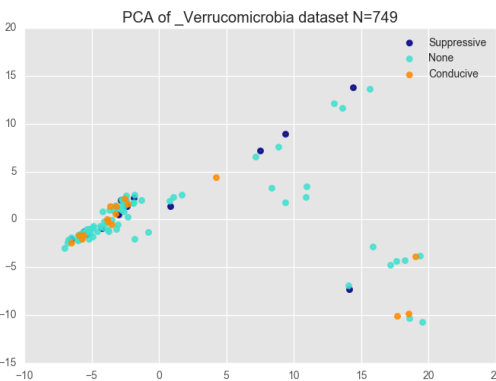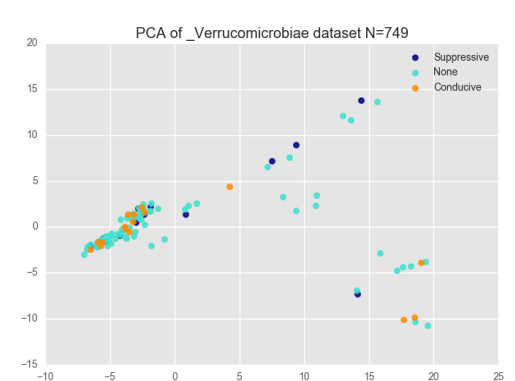

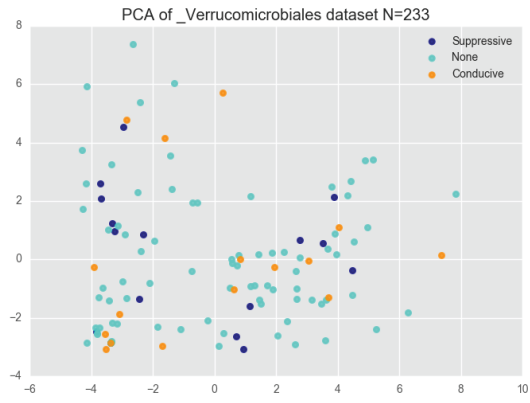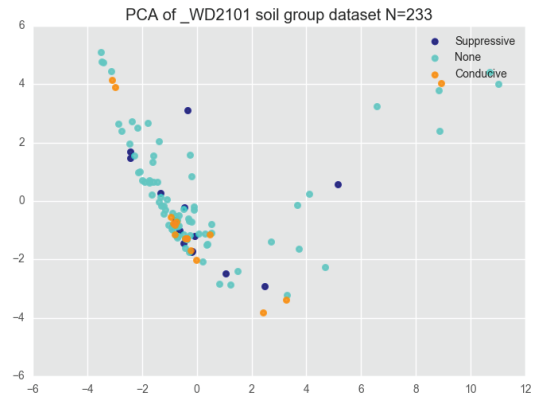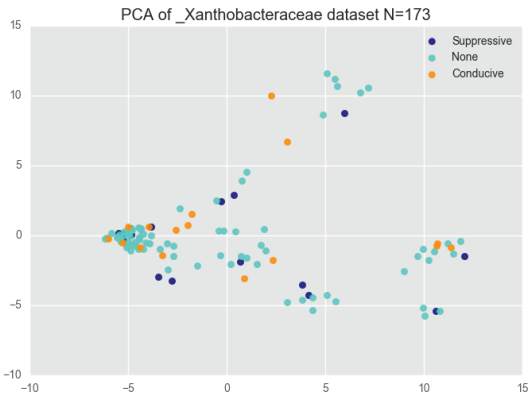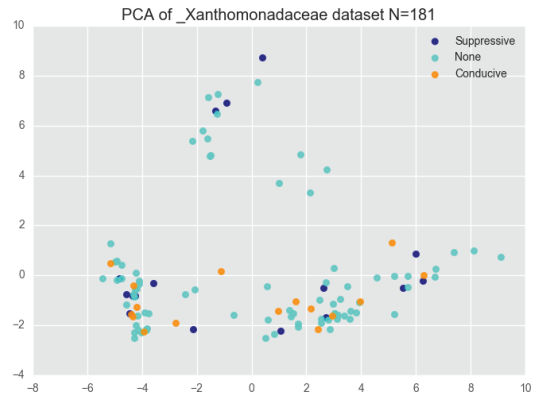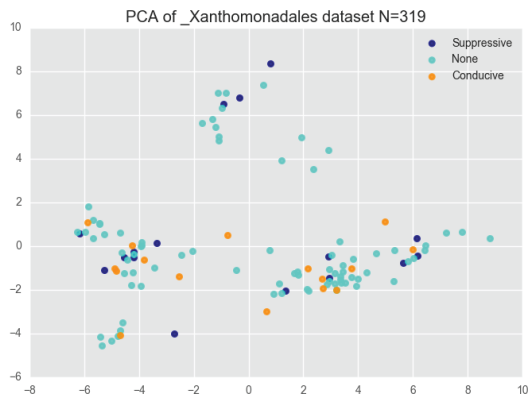

Figure S4. PCA plots of different taxonomy groups. The number of ASVs used for the component analysis is reported on top of each plot together with the taxonomic group represented in the figure.

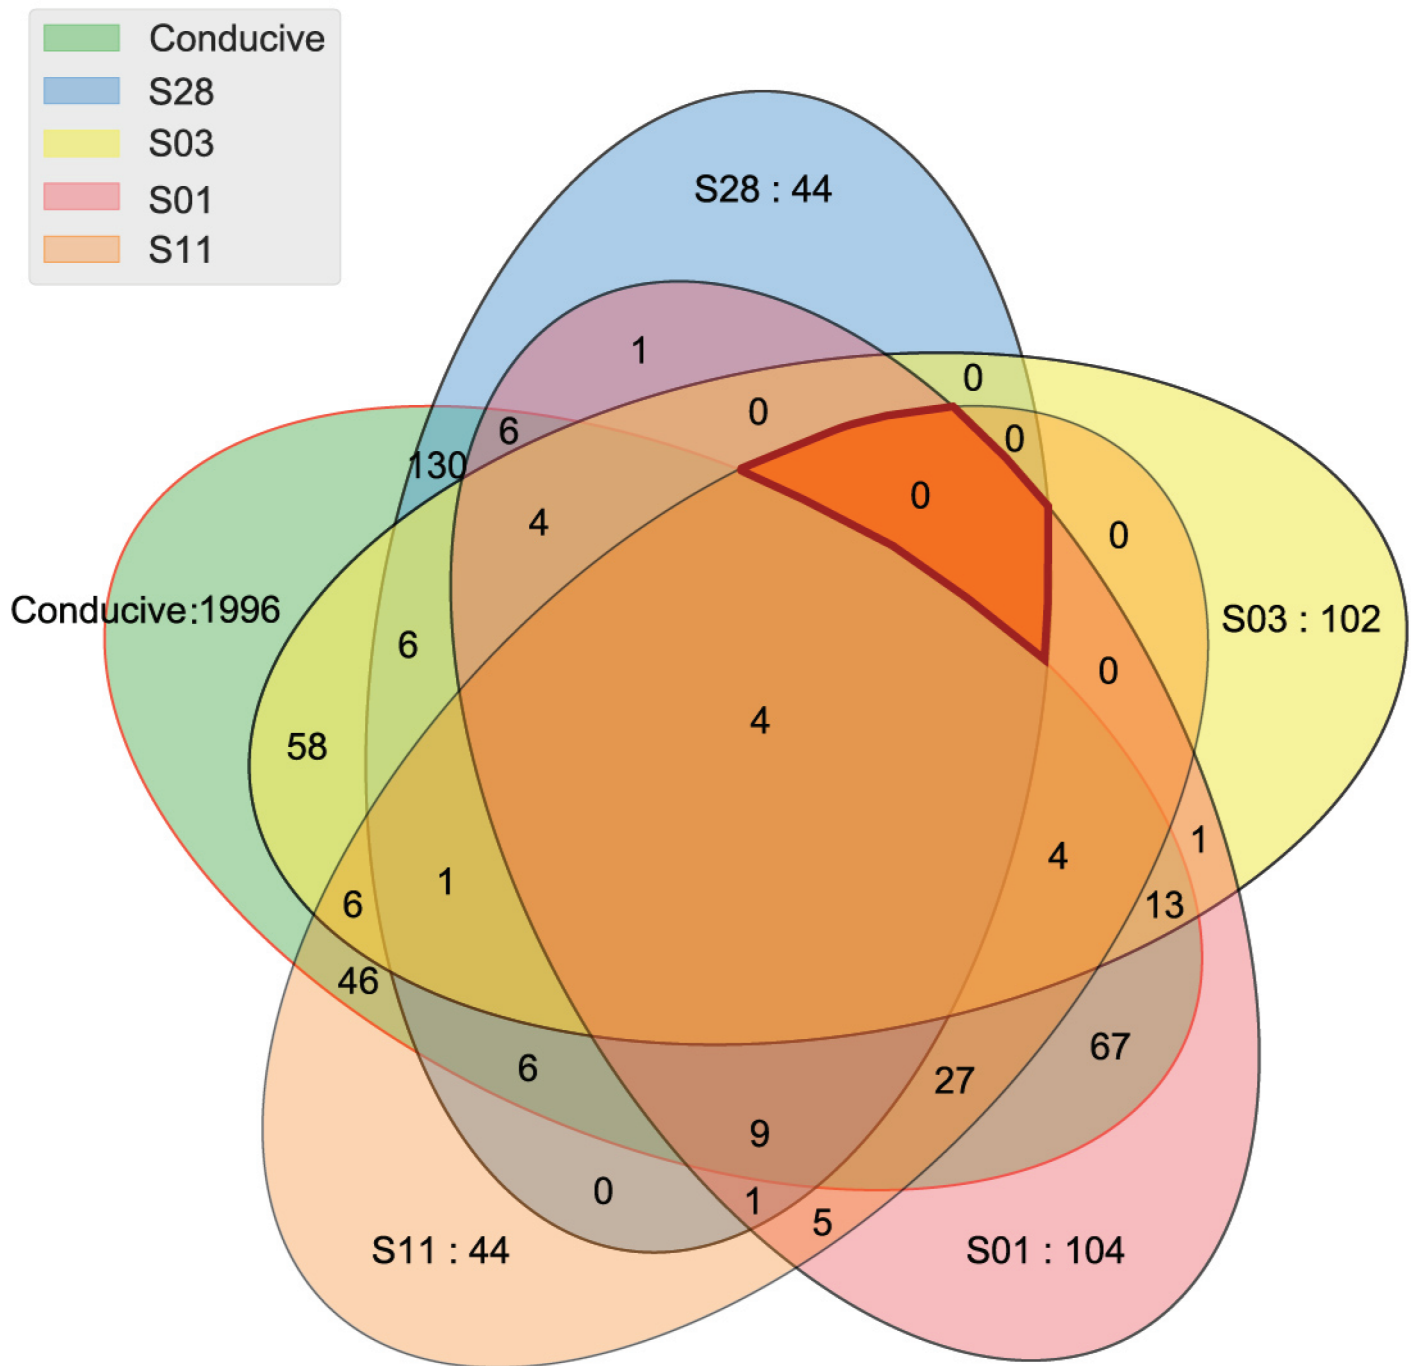

Figure S5. Presence-absence patterns of consistent ASVs. Venn diagram representing the ASVs which consistently appear in all replicates for each of the suppressive samples (S01, S03, S11 and S28) and the conducive samples (here grouped under “conductive”).



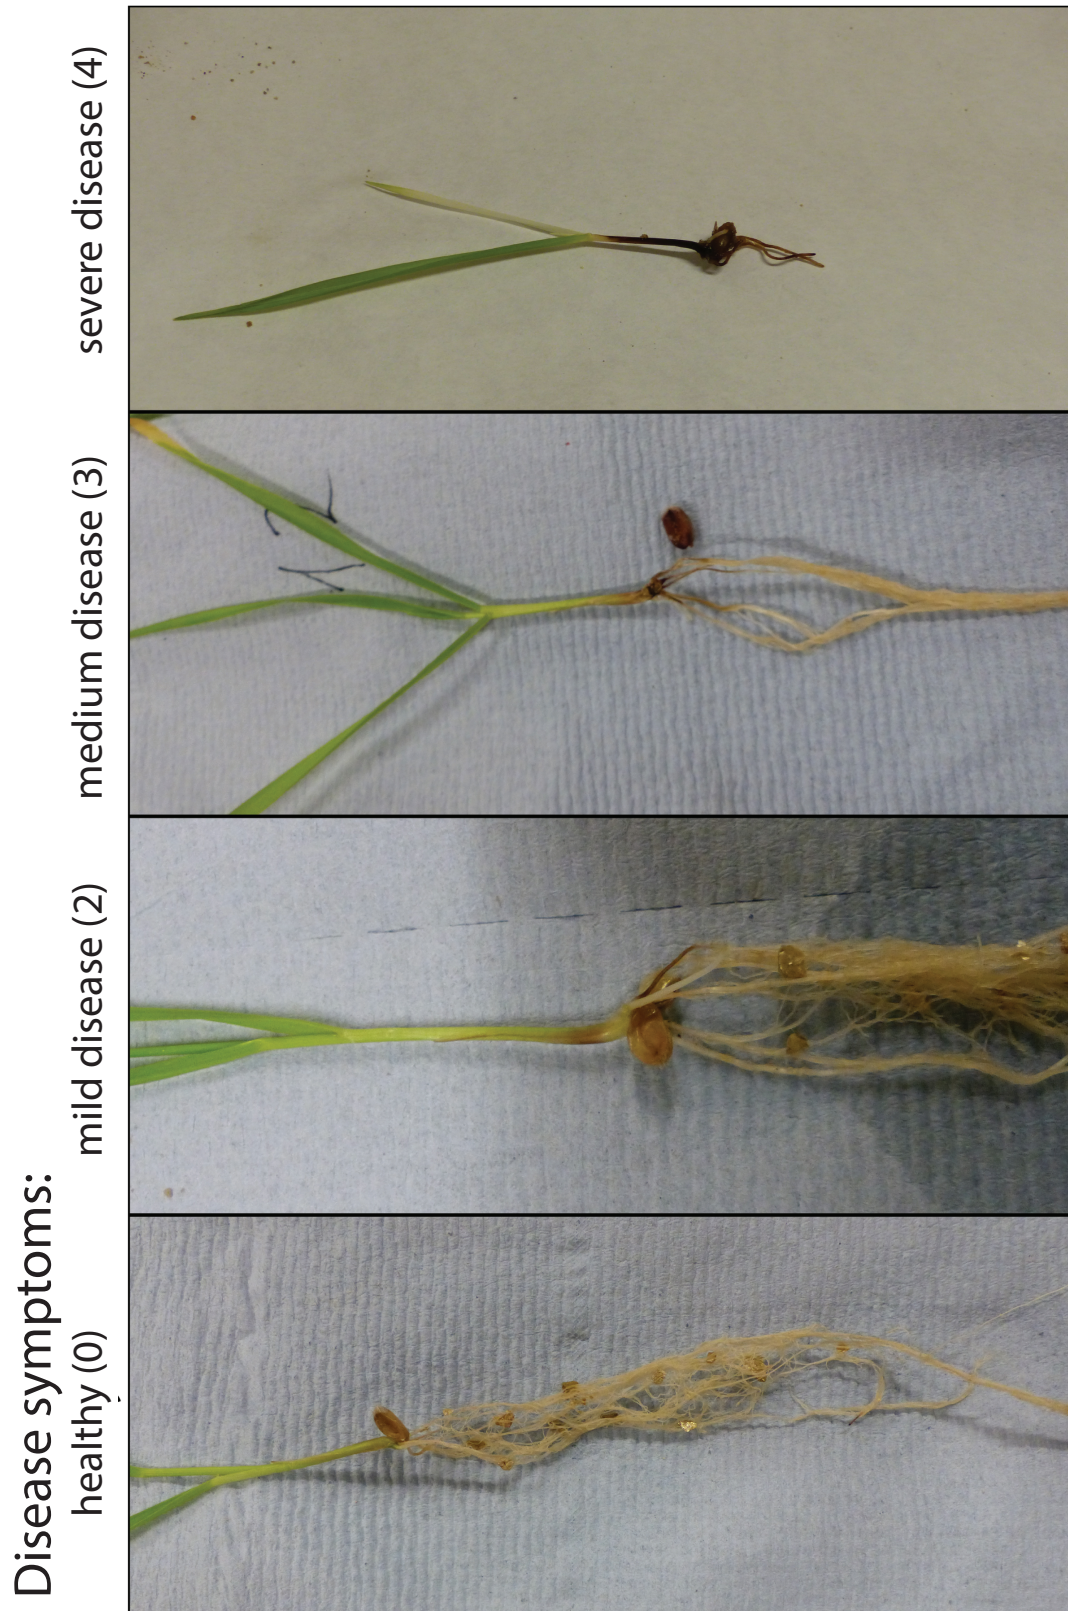

Figure S6. Examples of healthy and diseased plants obtained in the screening with disease scores indicated in brackets.
